# Supplementary material for: Different Methods for Evaluating Microglial Activation Using Anti-Ionized Calcium-Binding Adaptor Protein-1 Immunohistochemistry in the Cuprizone Model
Source: MDPI journal article supplement (doi:10.3390/cells11111723), 2022-05-24
Supplement: s1 [file s1]

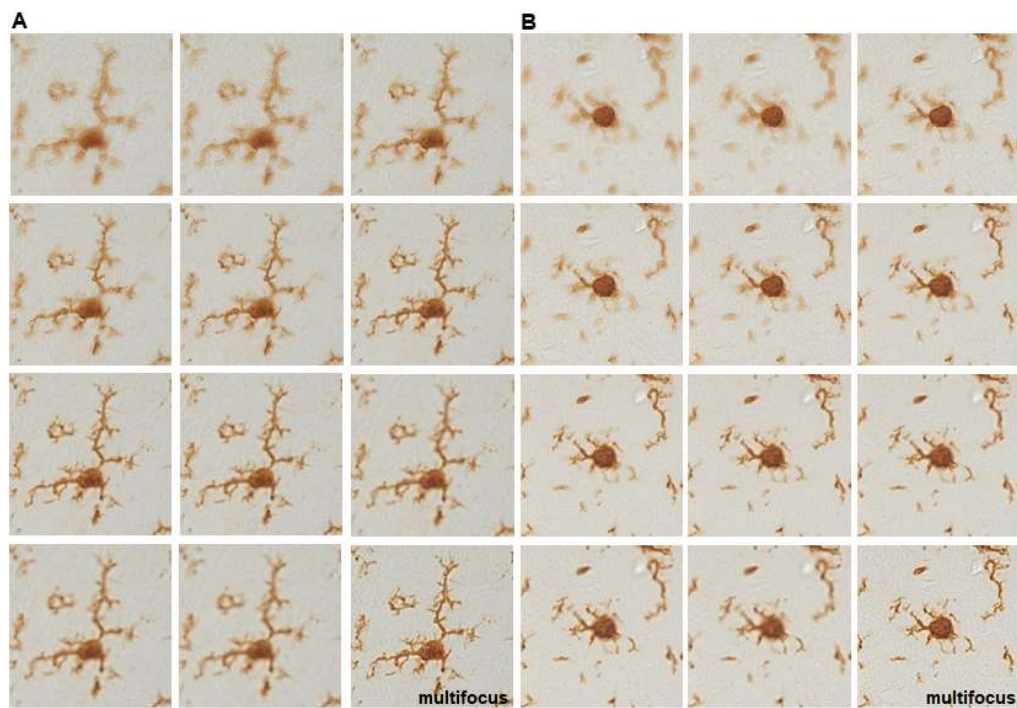

Figure S1: Representative IBA1<sup>+</sup> microglia cells in Z-stack steps and multifocus images. (A) resting microglia cell in Z-stack steps and multifocus images, (B) activated microglia cell in Z-stack and multifocus images.
